# Supplementary material for: Grass-like Co2P superstructures: direct synthesis between elements, forming mechanism and catalytic properties
Source: Royal Society of Chemistry journal article supplement (doi:10.1039/c5ra21579j), 2016-01-01
Supplement: c5ra21579j1.pdf [file c5ra21579j1.pdf]

## Supporting Information

### Grass-like Co<sub>2</sub>P superstructures: Direct synthesis between elements, forming mechanism and catalytic properties

*Hao Wu, Yonghong Ni\*, Feng Hong, Dican Lu and Yanling Xiao*

College of Chemistry and Materials Science, Key Laboratory of Functional Molecular Solids of Ministry of Education, Anhui Laboratory of Molecule-Based Materials, Anhui Key Laboratory of Functional Molecular Solids, Anhui Normal University, Wuhu, 241000, PR China

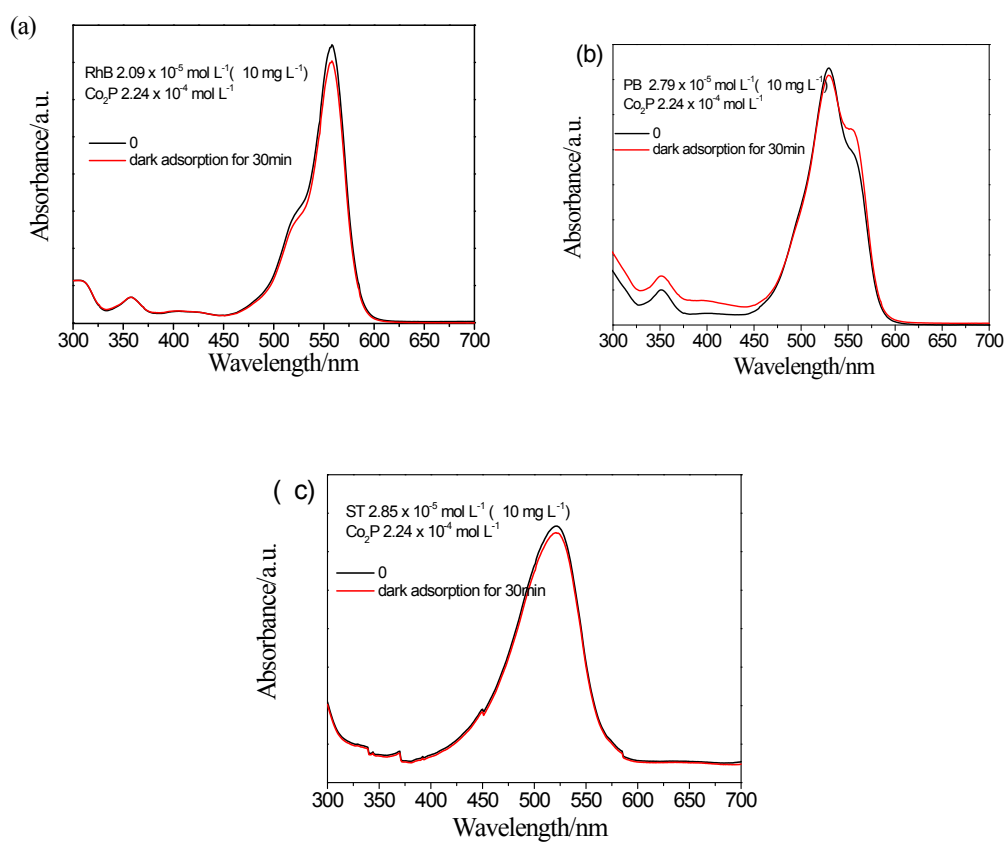

**Figure S1.** UV-Vis absorption spectra of Rhodamine B (a), Pyronine B (b) and Safranin T (c) in dark after adsorption for 30 min in the presence of  $2.24 \times 10^{-4} \text{ mol L}^{-1}$  of grass-like  $\text{Co}_2\text{P}$  superstructures.
